# Supplementary material for: Predicting hepatocellular carcinoma development for cirrhosis patients via methylation detection of heparocarcinogenesis-related genes
Source: PubMed Central journal article supplement — J Cancer. 2018 Jun 4;9(12):2203–10. doi: 10.7150/jca.24024 (PMC6010674; doi:10.7150/jca.24024), 2018-06-04
Supplement: jcav09p2203s1.pdf [file jcav09p2203s1.pdf]

Supplementary materials:

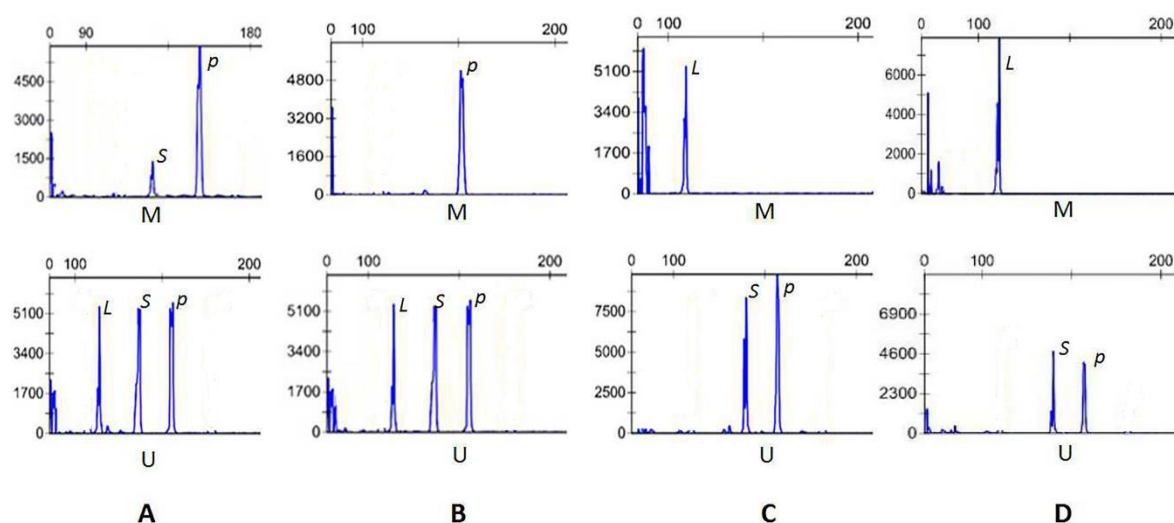

**Figure S1.** Multiplex MSP analysis of *p16*, *SFRP1 LINE1* was performed in plasma specimens. Representative results for hepatocellular carcinoma(HCC) (A), liver cirrhosis (B), benign lesion patients (C) and healthy people (D). M, methylation. U, unmethylation. The horizontal axis and vertical axis represents product size and peak height, respectively.

Table S1. Primer Sequences, Multiplex MSP conditions and Product size.

| Primer name    | Sense primer(5'-3')                | Antisense primer(5'-3')            | Annealing temp(°C) | PCR cycles | Product size(bp) |
|----------------|------------------------------------|------------------------------------|--------------------|------------|------------------|
| <b>RASSF1A</b> |                                    |                                    |                    |            |                  |
| MSP            | GGGTTTTGCGAGAGCGCG                 | GCTAACAAACGCGAACCG                 |                    |            | 169              |
| USP            | GGGGTTTTGTGAGAGTGTGTTTAG           | TAAACACTAACAAACACAAACCAAAC         |                    |            | 175              |
| <b>p16</b>     |                                    |                                    |                    |            |                  |
| MSP            | TTATTAGAGGGTGGGGCGGATCGC           | GACCCCGAACCGCGACCGTAA              |                    |            | 150              |
| USP            | TTATTAGAGGGTGGGGTGGATTGT           | CAACCCCAAACCACAACCATAA             | 63                 | 30         | 151              |
| <b>SFRP1</b>   |                                    |                                    |                    |            |                  |
| MSP            | TGTAGTTTTCGGAGTTAGTGTGCGC<br>GC    | CCTACGATCGAAAACGACGCGAAC<br>G      |                    |            | 126              |
| USP            | GTTTTGTAGTTTTTGGAGTTAGTGT<br>TGTGT | CTCAACCTACAATCAAAAACAACA<br>CAAACA |                    |            | 135              |
| <b>SOCS3</b>   |                                    |                                    |                    |            |                  |
| MSP            | GGAGATTTTAGGTTTTCGGAATATT<br>TC    | CCCCGAAACTACCTAAACGCCG             |                    |            | 142              |
| USP            | GTTGGAGATTTTAGGTTTTGGAATA          | AAACCCCAAAACTACCTAAACAC            |                    |            | 148              |

---

|       | TTTT                   | CA                        |     |
|-------|------------------------|---------------------------|-----|
| LINE1 |                        |                           |     |
| MSP   | CGCGAGTCGAAGTAGGGC     | ACCCGATTTTCCAAATACGACCG   | 111 |
| USP   | TGTGTGTGAGTTGAAGTAGGGT | ACCCAATTTTCCAAATACAACCATC | 116 |
|       |                        | A                         |     |

---
